# Supplementary material for: Axonal Lysosomal Assays for Characterizing the Effects of LRRK2 G2019S
Source: MDPI journal article supplement (doi:10.3390/biology13010058), 2024-01-20
Supplement: s1 [file s1]

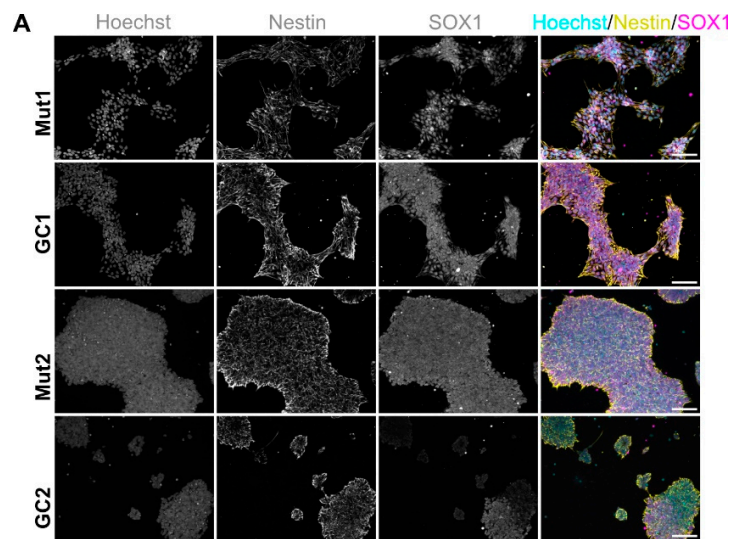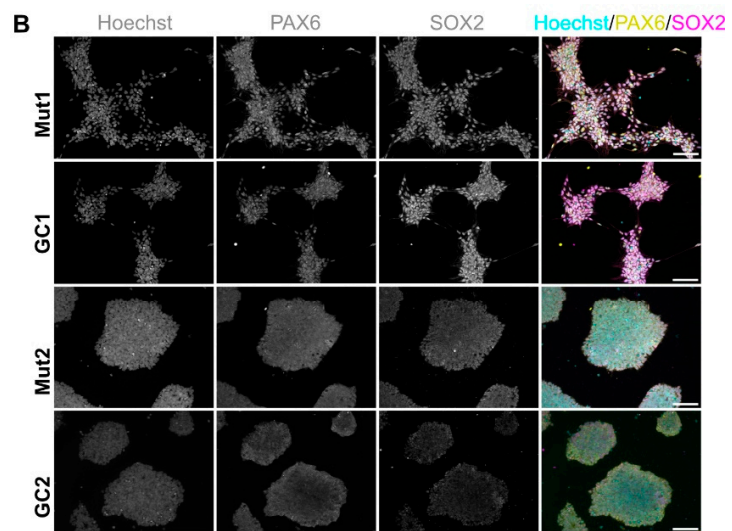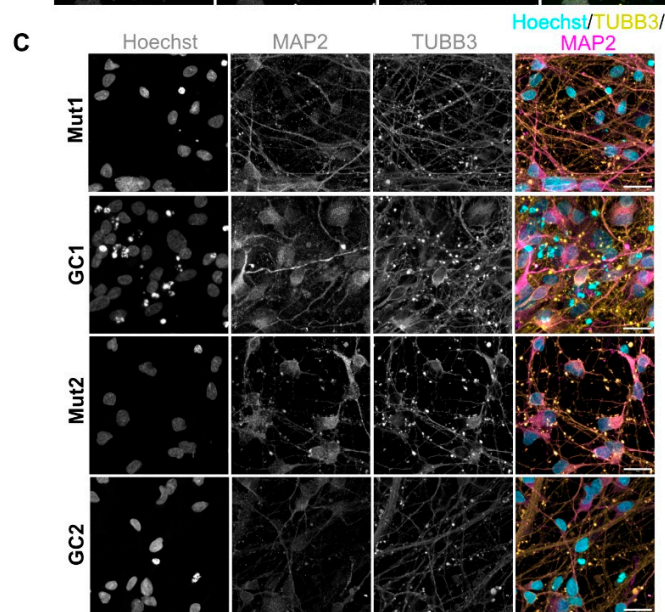

**Figure S1: Expression of neural progenitor markers in NPCs and neuronal markers in differentiated neurons.** Representative micrographs confirm the presence of neural progenitor markers **(A)** Nestin and SOX1, **(B)** PAX6 and SOX2 in Mut1, GC1, Mut2, and GC2. Scale bar = 100  $\mu\text{m}$ . **(C)** Representative micrographs confirm the presence of pan-neuronal markers MAP2 and TUBB3 in neurons differentiated from Mut1, GC1, Mut2, and GC2. Scale bar = 25  $\mu\text{m}$ .

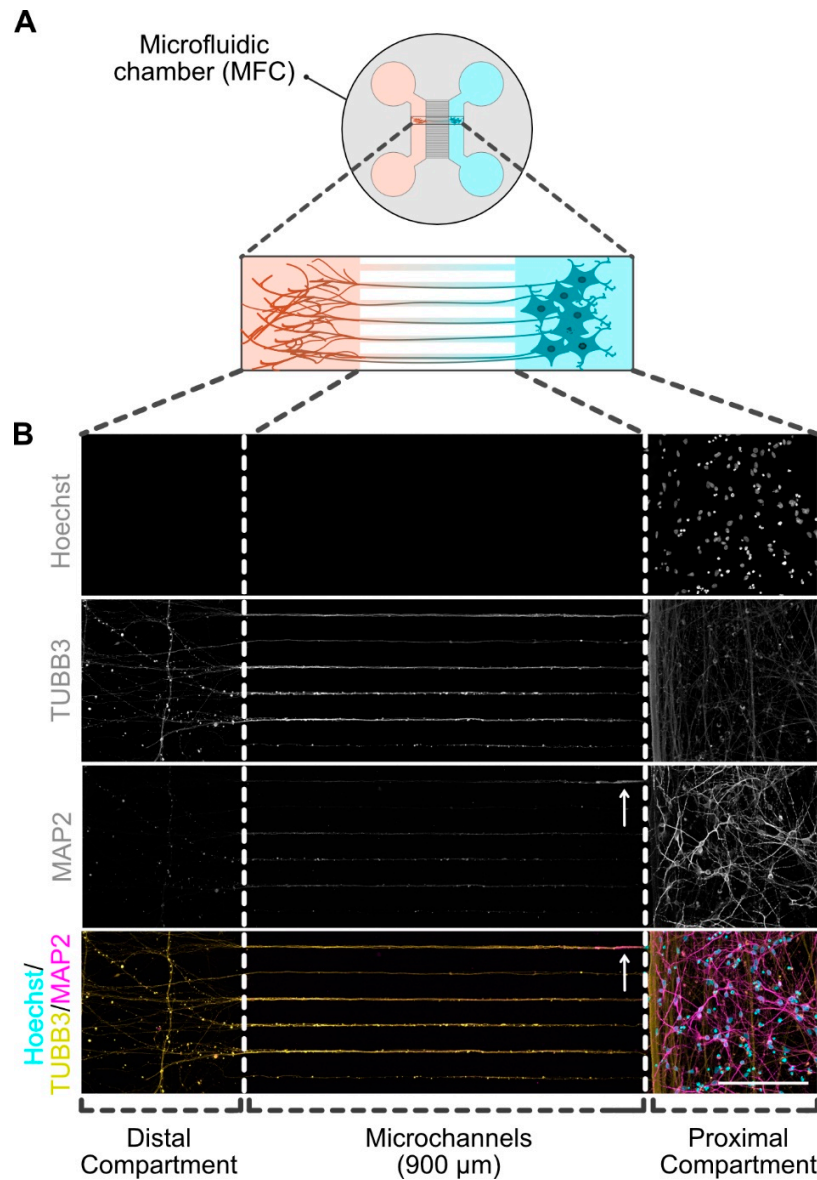

**Figure S2: Spatial isolation of axons from soma and dendrites using microfluidic chambers.**

**(A)** Schematic representation of MFCs, with soma in the proximal compartment and axonal outgrowth through microchannels (900  $\mu\text{m}$ ) to the distal compartment. **(B)** Representative micrographs confirm TUBB3-positive axons in the distal compartment, while nuclei (Hoechst) and dendrites (MAP2) remain primarily in the proximal compartment. A white arrow marks the initial section of a microchannel penetrated by dendrites. Scale bar = 200  $\mu\text{m}$ .

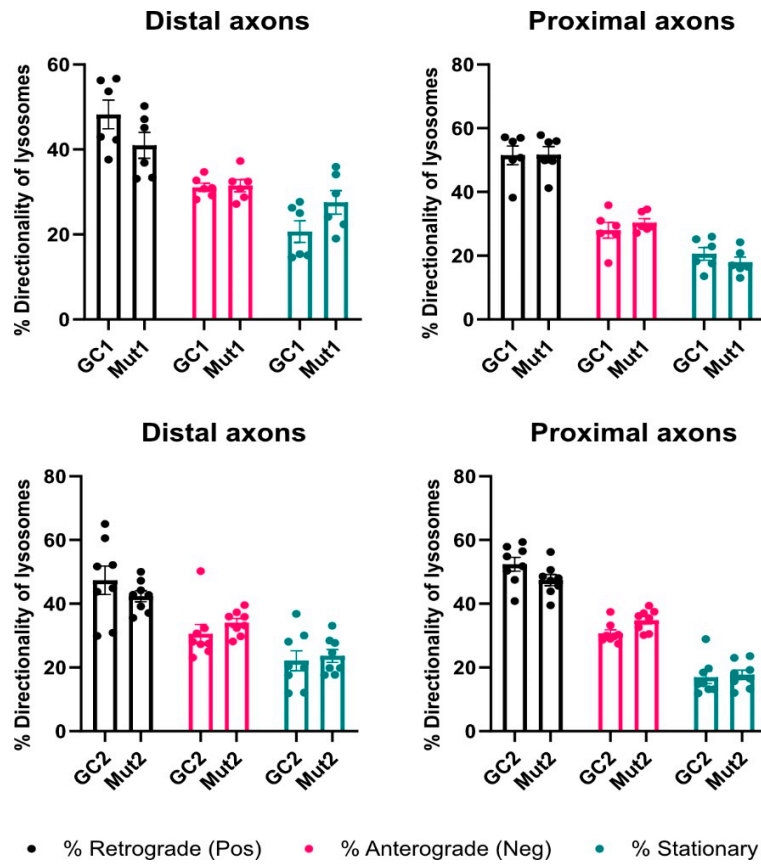

**Figure S3: Directionality of lysosomes.**

The relative proportion of retrograde, anterograde, and stationary lysosomes in distal and proximal axons of GC1-Mut1 (top) and GC2-Mut2 (bottom). There is no significant difference between GC and Mut in any direction, according to 2-way ANOVA.

Kymograph-based

Distal Axon

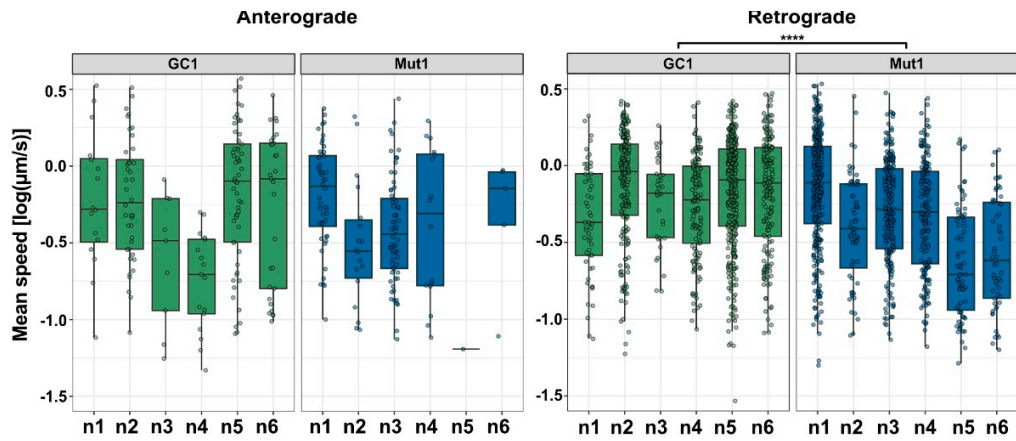

Proximal Axon

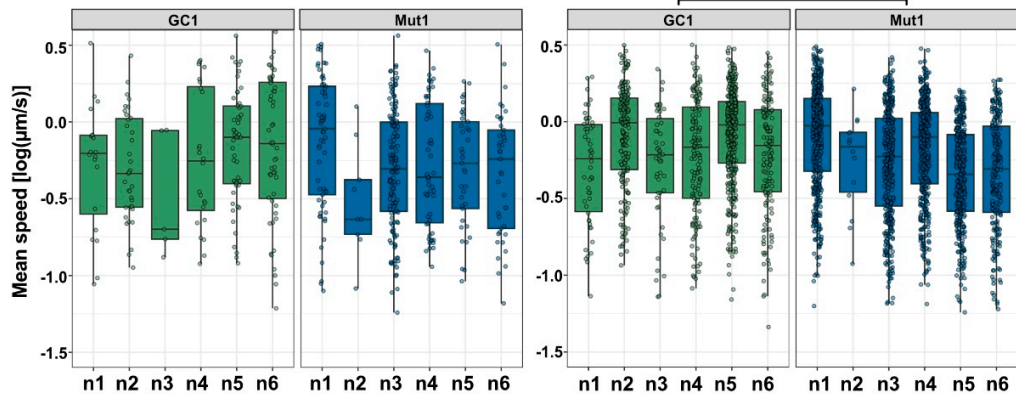

Object-based

Distal Axon

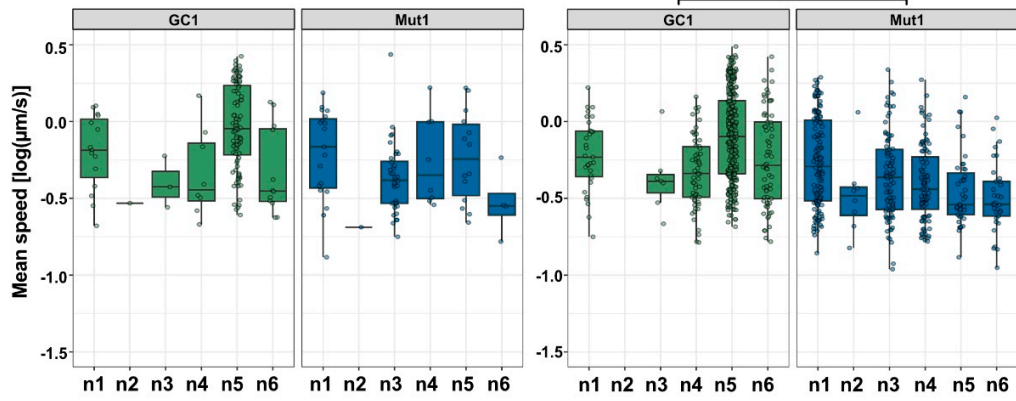

Proximal Axon

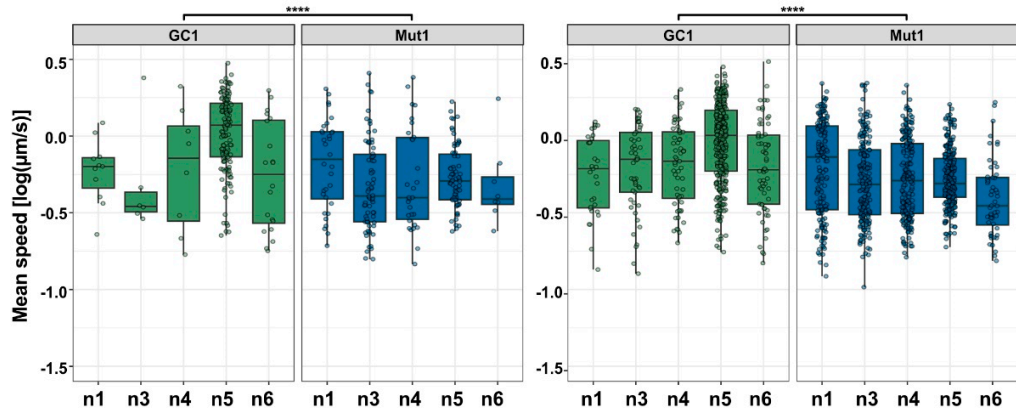



**Figure S4. Quantification of mean speed of lysosomal trafficking in GC1 and Mut1 neurons.**

Modified graphical representation of Figure 2A, with box-plots of individual experimental replicates (n), quantifying the mean speed of anterograde and retrograde lysosomes in distal and proximal axons of GC1 and Mut1 neurons by kymograph-based analysis (top) and object-based analysis (bottom). Statistics were calculated using 2-way ANOVA with post-hoc Tukey test to compare GC and Mut, considering any variation between the experimental replicates. \*\*\*\* corresponds to  $p\text{-adj} \leq 0.0001$ . Comparisons without a marked \* did not report any significant differences. The exact mean difference and p-values can be found in Table S1.

Kymograph-based

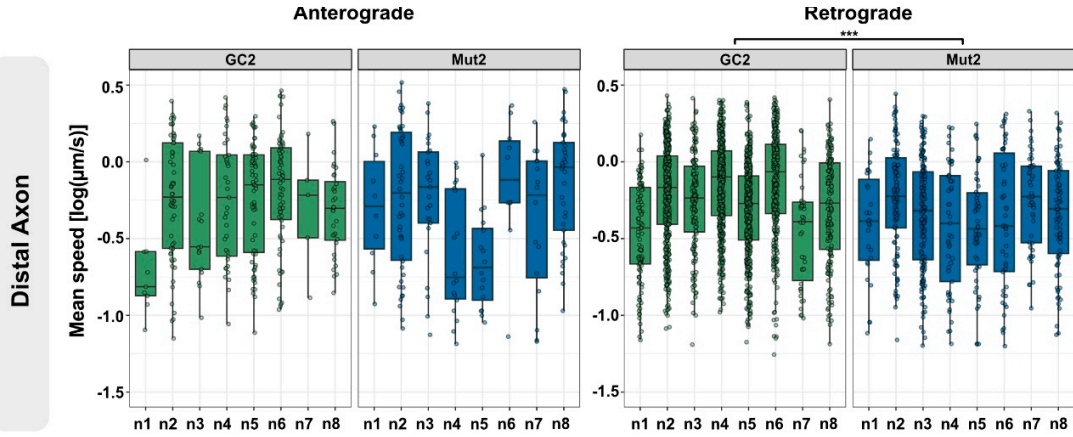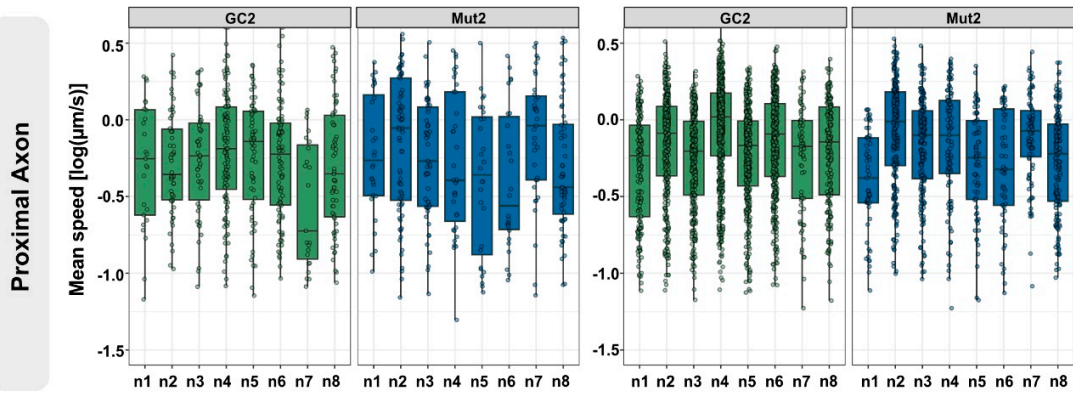

Object-based

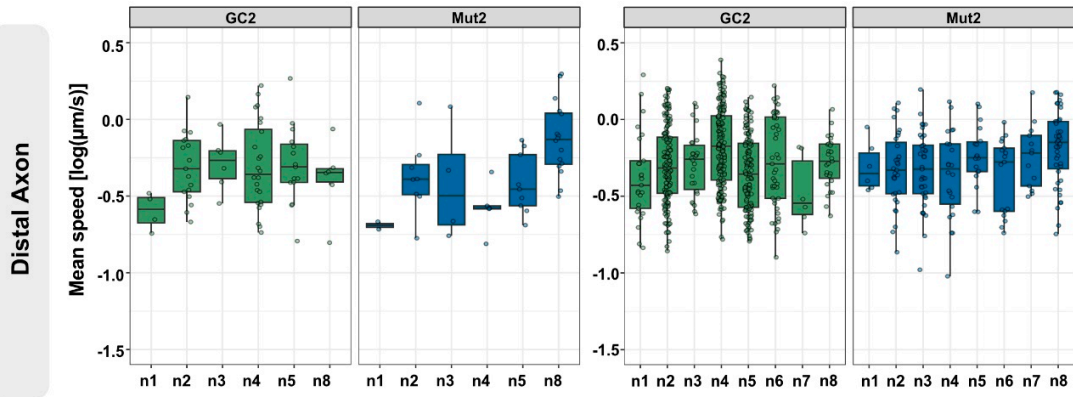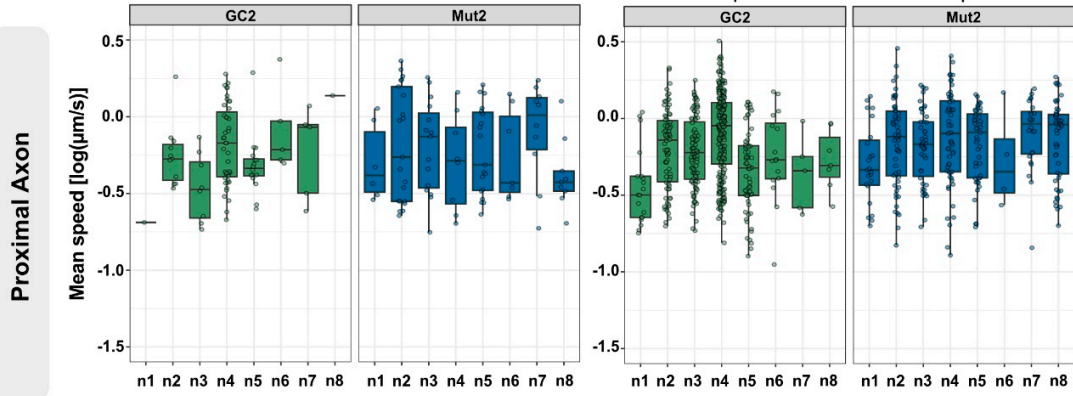

**Figure S5. Quantification of mean speed of lysosomal trafficking in GC2 and Mut2 neurons.**

Modified graphical representation of Figure 2B, with box-plots of individual experimental replicates (n), quantifying the mean speed of anterograde and retrograde lysosomes in distal and proximal axons of GC1 and Mut1 neurons by kymograph-based analysis (top) and object-based analysis (bottom). Statistics were calculated using 2-way ANOVA with post-hoc Tukey test to compare GC and Mut, considering any variation between the experimental replicates. \*\*\* corresponds to  $p\text{-adj} \leq 0.001$ , and \* to  $p\text{-adj} \leq 0.05$ . Comparisons without a marked \* did not report any significant differences. The exact mean difference and p-values can be found in Table S1.

Kymograph-based

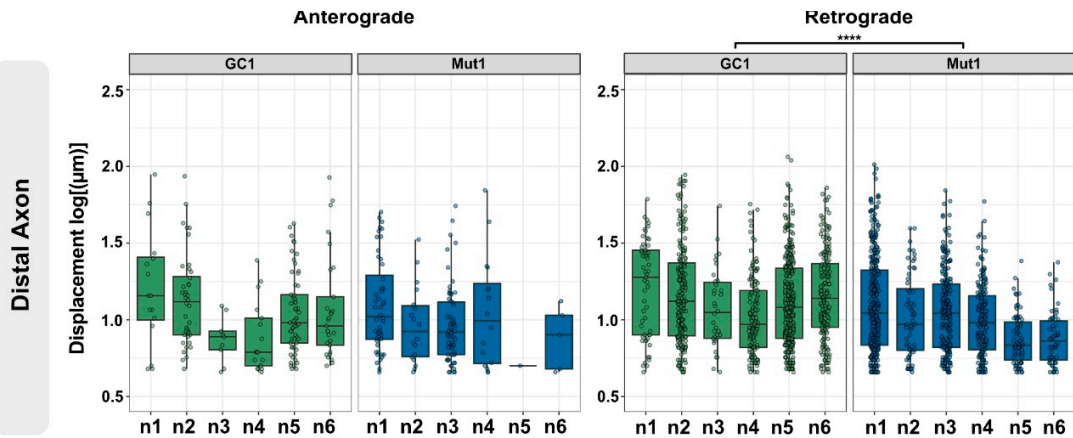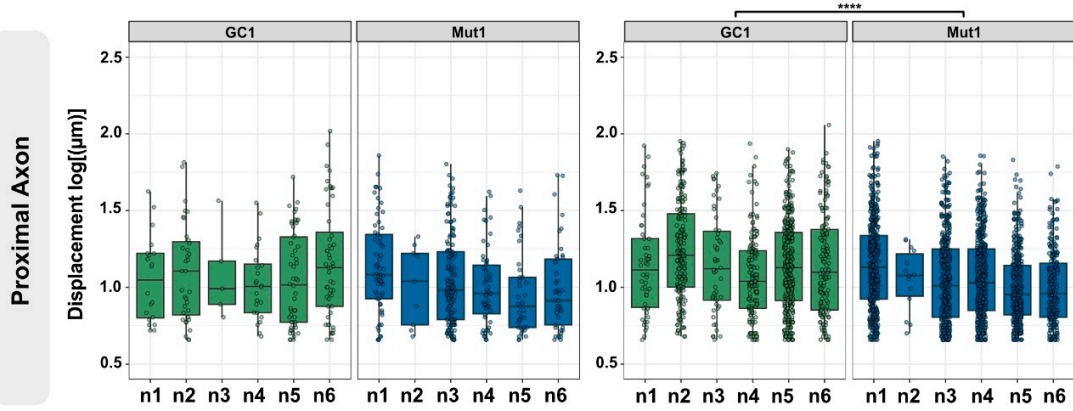

Object-based

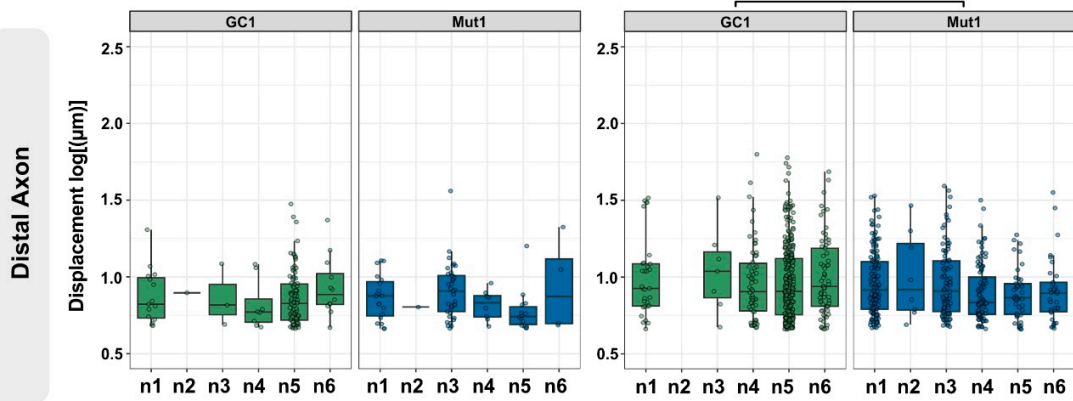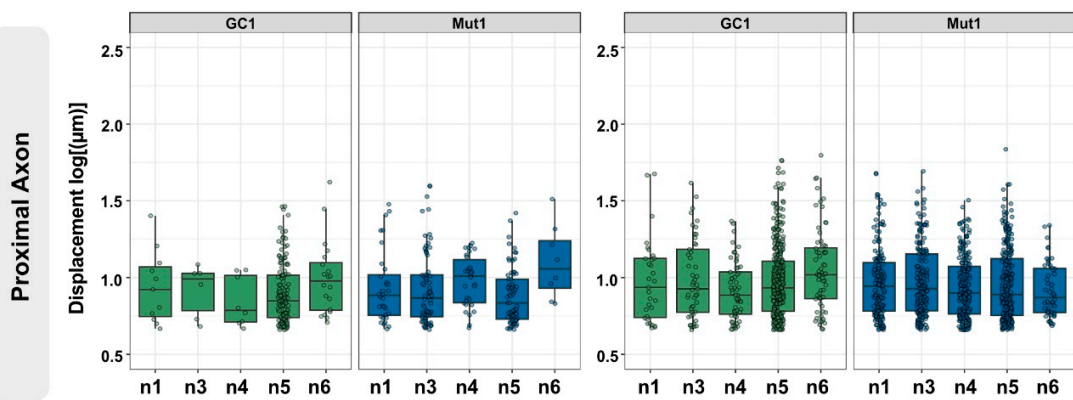



**Figure S6: LRRK2 G2019S is associated with a small reduction in the displacement of retrograde lysosomal trafficking in Mut1 neurons.**

Quantification of displacement of anterograde and retrograde lysosomes in the distal and proximal axons of GC1 and Mut1 neurons by kymograph-based analysis (top) and object-based analysis (bottom). Statistics were calculated using 2-way ANOVA with post-hoc Tukey test to compare GC and Mut, taking into consideration any variation between the experimental replicates (n). \*\*\*\* corresponds to  $p\text{-adj} \leq 0.0001$ , \*\* to  $p\text{-adj} \leq 0.01$ . Comparisons without a marked \* did not report any significant differences. The exact mean difference and p-values can be found in Table S1.

Kymograph-based

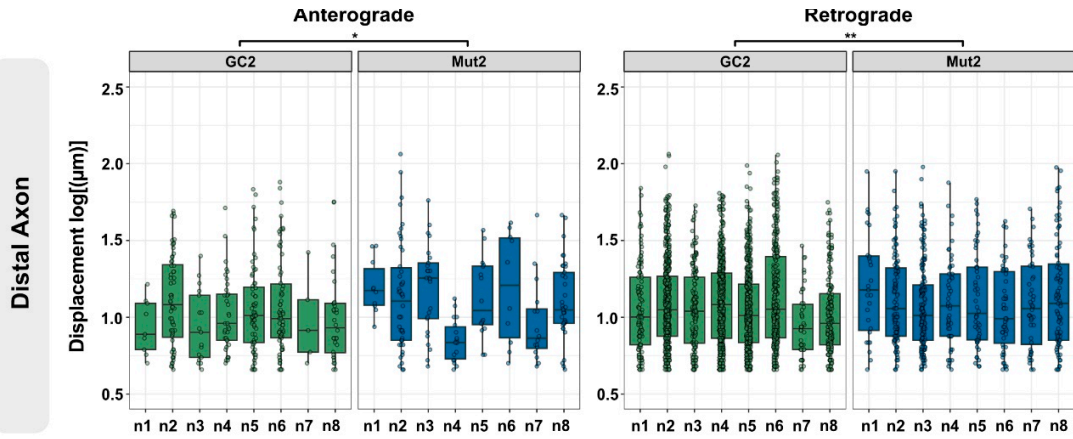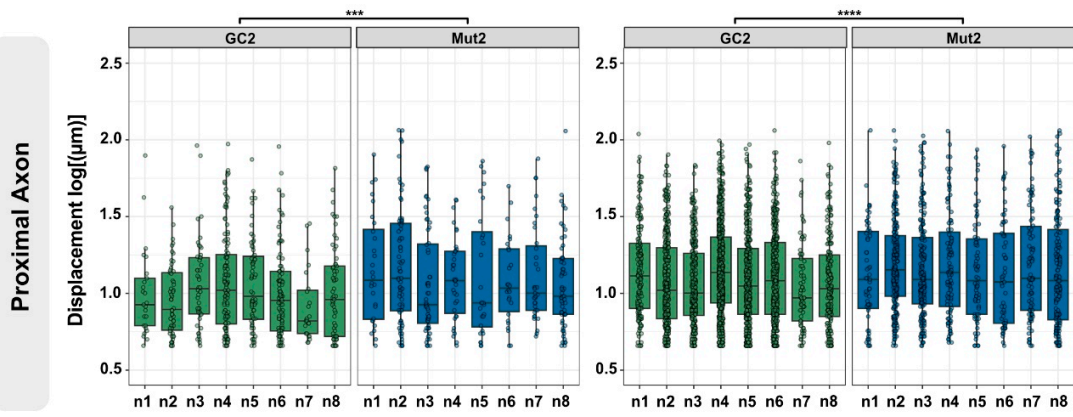

Object-based

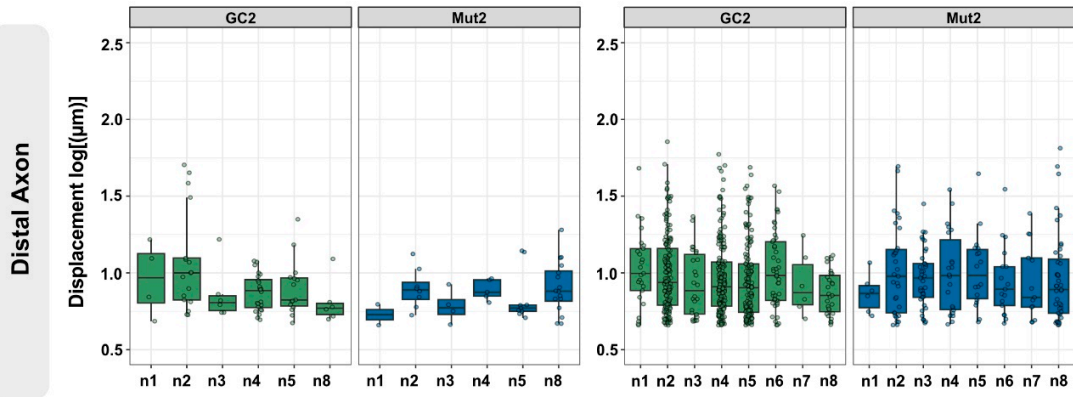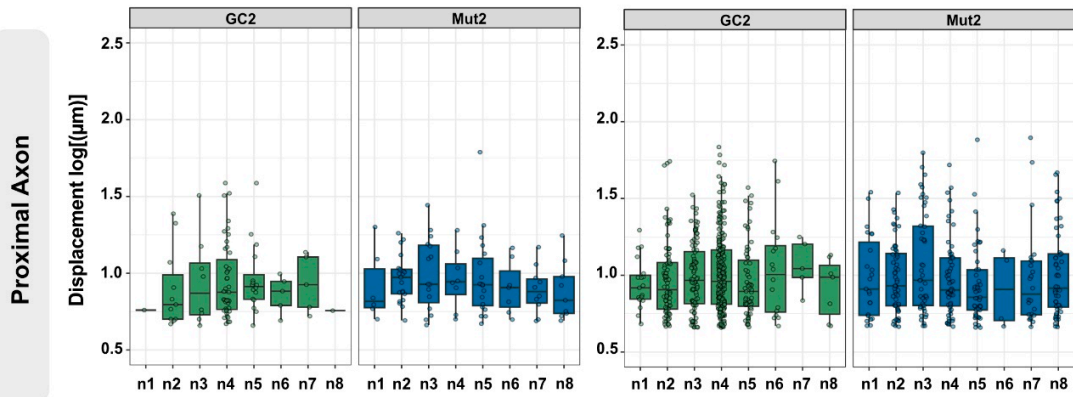

**Figure S7: LRRK2 G2019S is not associated with a consistent change in the displacement of lysosomal trafficking in Mut2 neurons.**

Quantification of displacement of anterograde and retrograde lysosomes in the distal and proximal axons of GC2 and Mut2 neurons by kymograph-based analysis (top) and object-based analysis (bottom). Statistics were calculated using 2-way ANOVA with post-hoc Tukey test to compare GC and Mut, taking into consideration any variation between the experimental replicates (n). \*\*\*\* corresponds to  $p\text{-adj} \leq 0.0001$ , \*\*\* to  $p\text{-adj} \leq 0.001$ , \*\* to  $p\text{-adj} \leq 0.01$ , and \* to  $p\text{-adj} \leq 0.05$ . Comparisons without a marked \* did not report any significant differences. The exact mean difference and p-values can be found in Table S1.

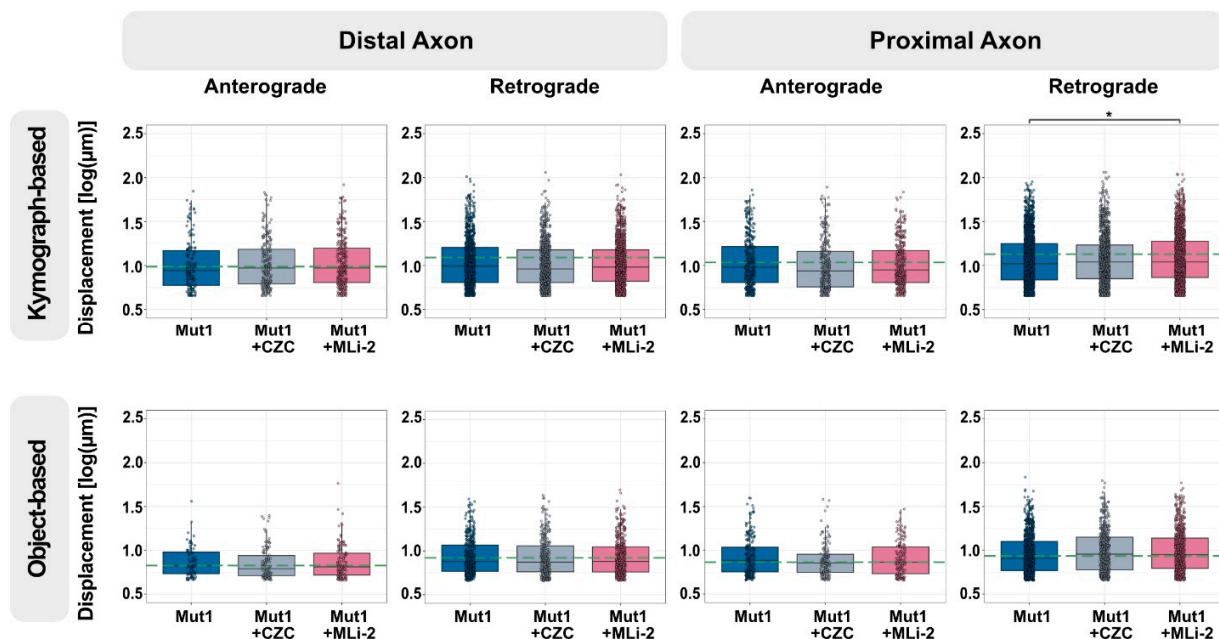

**Figure S8: LRRK2 kinase inhibitors do not significantly affect the displacement of retrograde lysosomes in the distal or proximal axon.**

Quantification of displacement of anterograde and retrograde lysosomes in the distal and proximal axons of Mut1 neurons without and with 2  $\mu$ M LRRK2 kinase inhibitors CZC-25146 or MLI-2 for 48 hours by kymograph-based analysis (top) and object-based analysis (bottom). The green dashed line marks the median lysosomal displacement of GC1 in the specific direction and position. For all graphs: Pooled individual measurements from N = at least 6 independent experimental replicates. Statistics were calculated using 2-way ANOVA with post-hoc Tukey test to compare the effect of compound treatment, taking into consideration any variation between the experimental replicates. \* corresponds to  $p\text{-adj} \leq 0.05$ . Comparisons without a marked \* were not significantly different than Mut1. The exact mean difference and p-values can be found in Table S1.



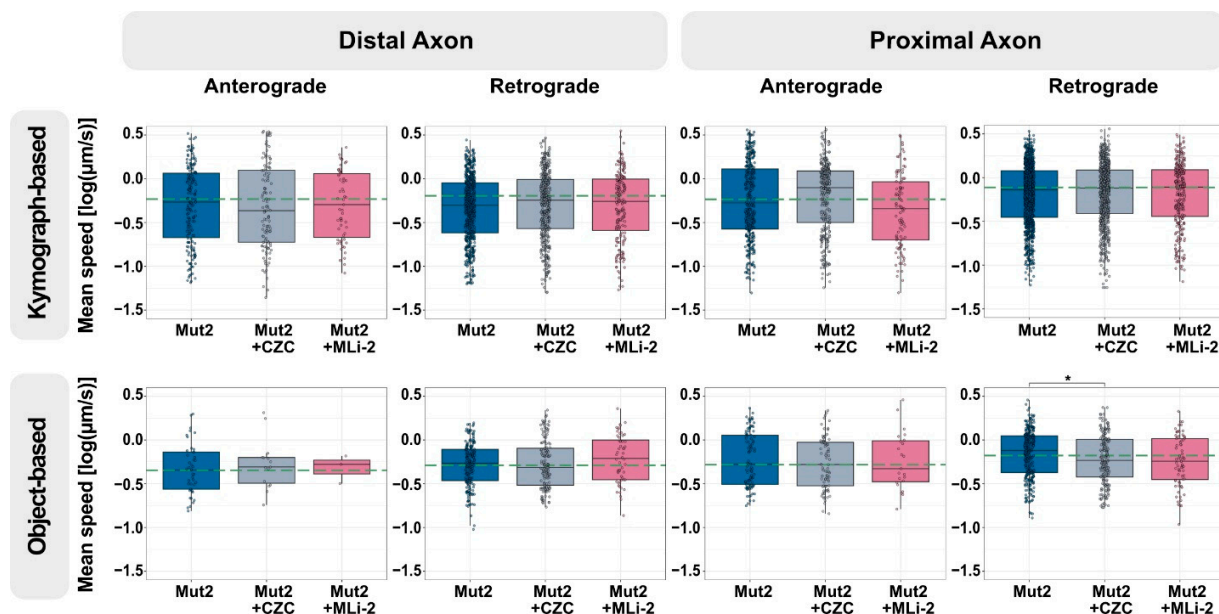

**Figure S9: LRRK2 inhibitor treatment does not affect the speed of Mut2 axonal lysosomes.**

Quantification of the mean speed of anterograde and retrograde lysosomes in the distal and proximal axons of Mut2 neurons without and with 2  $\mu$ M LRRK2 kinase inhibitors CZC-25146 or MLI-2 for 48 hours by kymograph-based analysis (top) and object-based analysis (bottom). The green dashed line marks the median lysosomal speed of GC2 in the specific direction and position. For all graphs: Pooled individual measurements from N = at least 6 independent experimental replicates. Statistics were calculated using 2-way ANOVA with post-hoc Tukey test to compute the effect of compound treatment on comparison with no treatment, taking into consideration any variation between the experimental replicates. \* corresponds to  $p_{\text{adj}} \leq 0.05$ . Comparisons without a marked \* were not significantly different than Mut2. The exact mean difference and p-values can be found in Table S1.

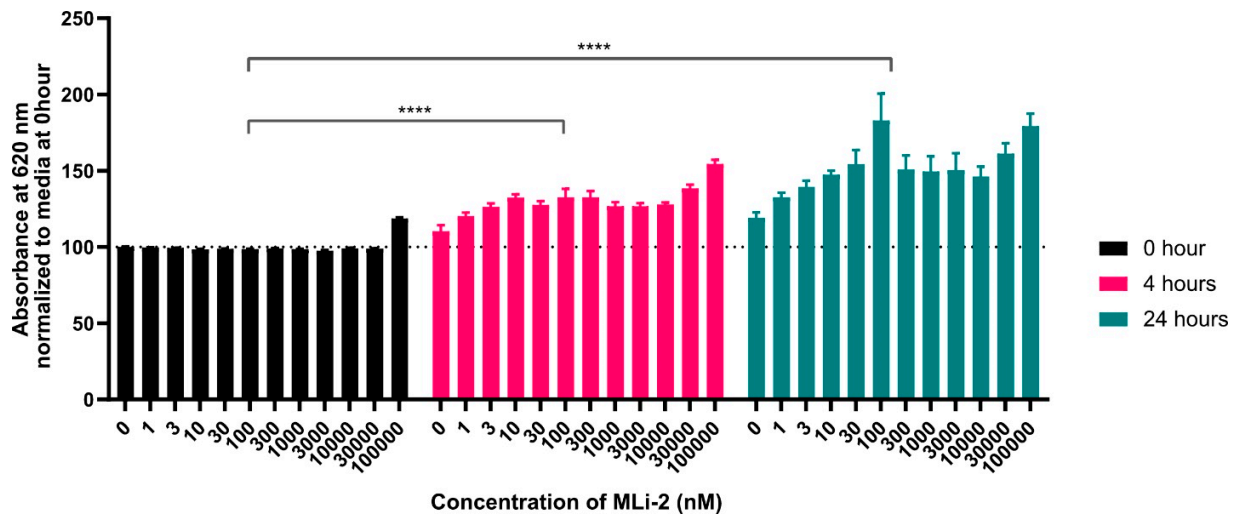

**Figure S10: Precipitation of MLI-2 in media incubated at 37°C over time.**

MLi-2 diluted in maturation medium over a range of concentrations was incubated at 37°C for 24 hours. Turbidimetric solubility assay measuring the absorbance at 620 nm at 0, 4, and 24 hours revealed the onset of precipitation and lack of solubility of MLI-2 over time based on the increase in absorbance value with MLI-2 relative to that of only media control at the start of the experiment. Statistics were calculated using 2-way ANOVA with post-hoc Tukey's multiple comparisons test. \*\*\*\* corresponds to  $p\text{-adj} \leq 0.0001$ .

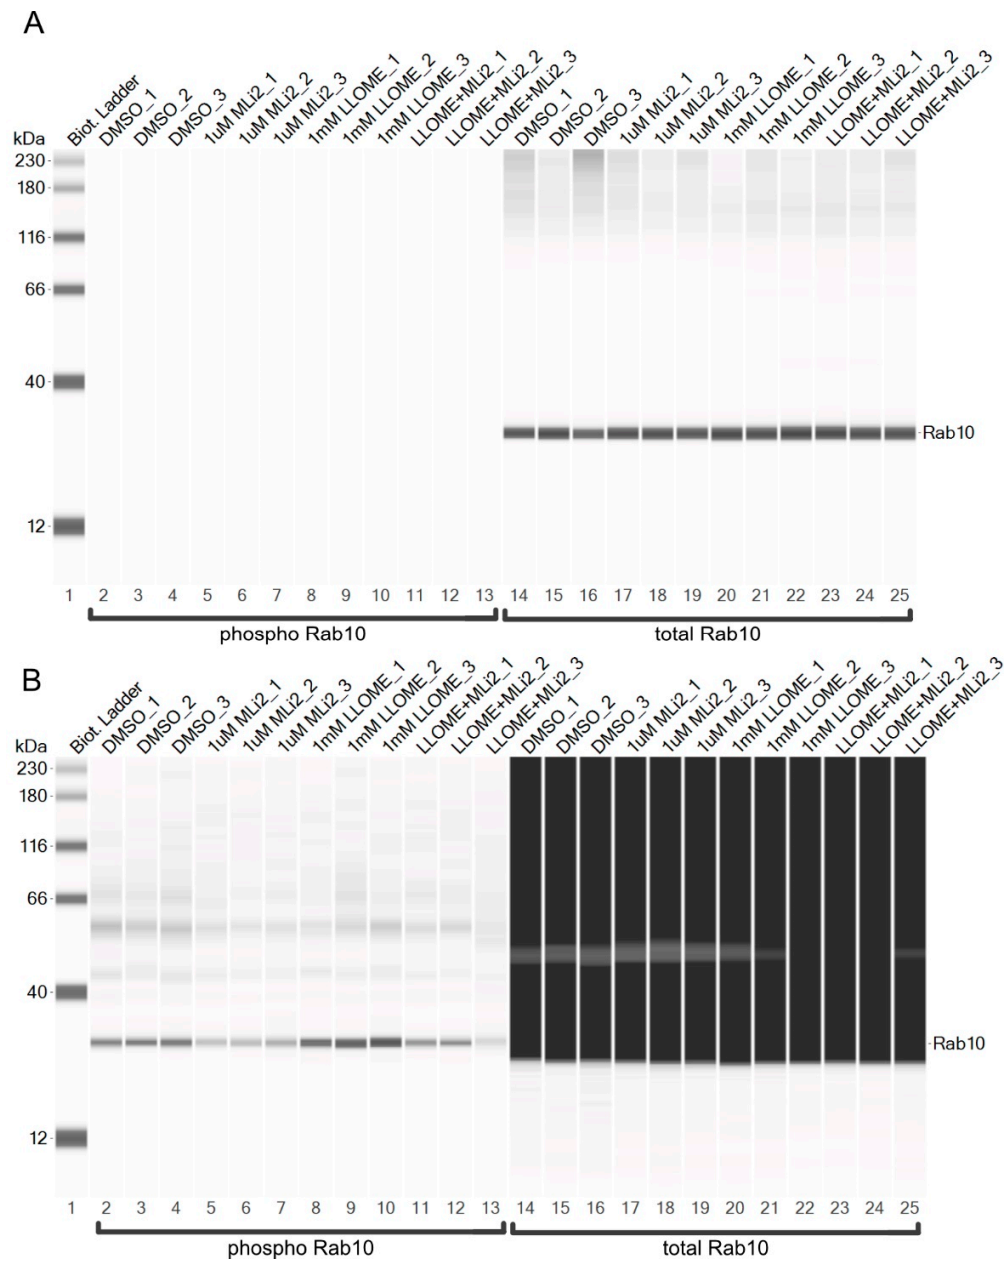

**Figure S11: Uncropped WES blots of phospho-Rab10 and total Rab10 levels in LLOME and MLi-2 treated Mut1 neurons.**

Uncropped Wes lane view (from Figure 5) measuring levels of phospho Rab10 and total Rab10 from whole cell lysates of DMSO, MLi-2, LLOME and MLi-2+LLOME treated Mut1 neurons (3 technical replicates for each condition). **(A)** Exposed Lanes 14-25 detecting the 30kDa total Rab10. **(B)** Adjusted contrast to detect phospho-Rab10 in Lanes 2-13.

| Figure No. | Position | Direction   | Parameter              | Analysis method | Condition1 | Condition 2 | Mean difference | p-adj-value | 95% confidence interval |             |
|------------|----------|-------------|------------------------|-----------------|------------|-------------|-----------------|-------------|-------------------------|-------------|
|            |          |             |                        |                 |            |             |                 |             | Lower bound             | Upper bound |
| 2A         | Distal   | Retrograde  | Mean speed [log(um/s)] | Kymograph-based | GC1        | Mut1        | 0.118901234     | 1.4E-11     | 0.085709452             | 0.152093017 |
| 2A         | Distal   | Retrograde  | Mean speed [log(um/s)] | Object-based    | GC1        | Mut1        | 0.107607569     | 1.69E-08    | 0.070534005             | 0.144681133 |
| 2A         | Proximal | Anterograde | Mean speed [log(um/s)] | Object-based    | GC1        | Mut1        | 0.141639852     | 3.25E-07    | 0.0880848               | 0.195194904 |
| 2A         | Proximal | Retrograde  | Mean speed [log(um/s)] | Kymograph-based | GC1        | Mut1        | 0.072461235     | 1.45E-07    | 0.045506107             | 0.099416362 |
| 2A         | Proximal | Retrograde  | Mean speed [log(um/s)] | Object-based    | GC1        | Mut1        | 0.138734883     | 0           | 0.110857264             | 0.166612503 |
| 2B         | Distal   | Retrograde  | Mean speed [log(um/s)] | Kymograph-based | GC2        | Mut2        | 0.074935882     | 1.18692E-06 | 0.044754377             | 0.105117387 |
| 2B         | Proximal | Retrograde  | Mean speed [log(um/s)] | Object-based    | GC2        | Mut2        | -0.046588629    | 0.014573529 | -0.08394361             | -0.00923365 |
| S4A        | Distal   | Retrograde  | Displacement [log(um)] | Kymograph-based | GC1        | Mut1        | 0.088654611     | 4.38E-11    | 0.062606388             | 0.114702834 |
| S4A        | Distal   | Retrograde  | Displacement [log(um)] | Object-based    | GC1        | Mut1        | 0.040756978     | 0.009466613 | 0.009997132             | 0.071516823 |
| S4A        | Proximal | Retrograde  | Displacement [log(um)] | Kymograph-based | GC1        | Mut1        | 0.074596169     | 0           | 0.052226137             | 0.096966201 |
| S4B        | Distal   | Anterograde | Displacement [log(um)] | Kymograph-based | GC2        | Mut2        | -0.056465741    | 0.037228959 | -0.10957542             | -0.00335606 |
| S4B        | Distal   | Retrograde  | Displacement [log(um)] | Kymograph-based | GC2        | Mut2        | -0.035949562    | 0.007478874 | -0.06228446             | -0.00961467 |
| S4B        | Proximal | Anterograde | Displacement [log(um)] | Kymograph-based | GC2        | Mut2        | -0.083745168    | 0.000151062 | -0.12691869             | -0.04057164 |
| S4B        | Proximal | Retrograde  | Displacement [log(um)] | Kymograph-based | GC2        | Mut2        | -0.065969888    | 1.93E-08    | -0.08891582             | -0.04302396 |
| 3          | Distal   | Retrograde  | Mean speed [log(um/s)] | Kymograph-based | Mut1       | Mut1+MLI-2  | -0.039556723    | 0.032508707 | -0.07651532             | -0.00259813 |
| 3          | Proximal | Retrograde  | Mean speed [log(um/s)] | Kymograph-based | Mut1       | Mut1+MLI-2  | -0.046533139    | 0.000138543 | -0.07330616             | -0.01976012 |
| 3          | Proximal | Retrograde  | Mean speed [log(um/s)] | Object-based    | Mut1       | Mut1+MLI-2  | -0.073381438    | 5.51E-08    | -0.10384618             | -0.0429167  |
| S5         | Proximal | Retrograde  | Displacement [log(um)] | Kymograph-based | Mut1       | Mut1+MLI-2  | -0.023244226    | 0.036452445 | -0.04533914             | -0.00114931 |
| S6         | Proximal | Retrograde  | Mean speed [log(um/s)] | Object-based    | Mut2       | Mut2+CZC    | 0.066739437     | 0.022940438 | 0.00740384              | 0.126075033 |
| 3          | Proximal | Retrograde  | Mean speed [log(um/s)] | Kymograph-based | GC1        | Mut1+CZC    | 0.08083407      | 2.71E-07    | 0.042904559             | 0.118763581 |
| 3          | Proximal | Retrograde  | Mean speed [log(um/s)] | Object-based    | GC1        | Mut1+CZC    | 0.122714657     | 0           | 0.082222893             | 0.163206421 |
| 3          | Proximal | Retrograde  | Mean speed [log(um/s)] | Kymograph-based | GC1        | Mut1+MLI-2  | 0.033603105     | 0.070854058 | -0.00186631             | 0.069074517 |
| 3          | Proximal | Retrograde  | Mean speed [log(um/s)] | Object-based    | GC1        | Mut1+MLI-2  | 0.085325138     | 4.28E-08    | 0.047540621             | 0.123109655 |

**Table S1: Summary statistics and p-adj-values for axonal trafficking data**

Mean difference, adjusted p-values, lower and upper bound of the confidence interval for the mean, resulting from 2-way ANOVA and Tukey's multiple comparisons test. Only comparisons reported as statistically significant in each of the listed conditions are specified.



| <b>Pat ID</b> | <b>APOE Haplotype</b> | <b><i>MAPT</i> Haplotype<br/>(H2=protective,<br/>H1=risk)</b> | <b><i>SNCA</i> rs356220 or<br/>proxy rs356219<br/>(C=protective,<br/>T=risk)</b> | <b>Other genes</b>           |
|---------------|-----------------------|---------------------------------------------------------------|----------------------------------------------------------------------------------|------------------------------|
| Patient1      | E3/E3                 | H1/H2                                                         | C C                                                                              | GBA, PRKN,<br>PINK1 negative |
| Patient2      | E2/E3                 | H1/H1                                                         | T T                                                                              | GBA, PRKN,<br>PINK1 negative |

**Table S2: Genetic information of the two LRRK2 G2019S-PD patient donors.**

Genetic characteristics of the two LRRK2 G2019S-PD patients for Alzheimer APOE haplotype, and haplotype of frequent single nucleotide polymorphisms in PD risk factors MAPT and SNCA.

| Pat ID   | Gender | Birth year | Age at onset | Age at examination | Disease duration | LEDD | Hoehn & Yahr Stadium | UPDRS_S_III Score | MoC A-Total value | CSF Abeta42 pg/ml | CSF h-Tau pg/ml | CSF p-Tau 181 pg/ml | CSF NfL pg/ml | CSF alpha synuclein total pg/ml | Number of positive seedings in 30h | RT-QulC seeding result |
|----------|--------|------------|--------------|--------------------|------------------|------|----------------------|-------------------|-------------------|-------------------|-----------------|---------------------|---------------|---------------------------------|------------------------------------|------------------------|
| Patient1 | F      | 1931       | 70           | 75                 | 5                |      | 2.5                  |                   |                   |                   |                 |                     |               |                                 |                                    |                        |
| Patient1 | F      | 1931       | 70           | 76                 | 6                |      | 3                    |                   |                   |                   |                 |                     |               |                                 |                                    |                        |
| Patient1 | F      | 1931       | 70           | 77                 | 7                | 120  | 2.5                  | 41                |                   | 547               | 421             | 53                  | 1935          |                                 |                                    |                        |
| Patient1 | F      | 1931       | 70           | 78                 | 8                | 380  | 3                    | 60                |                   |                   |                 |                     |               |                                 |                                    |                        |
| Patient1 | F      | 1931       | 70           | 80                 | 10               | 580  | 4                    | 44                | 19                | 404               | 542             | 67                  |               | 575.4                           | 4                                  | positive               |
| Patient1 | F      | 1931       | 70           | 80                 | 10               | 760  | 3                    | 56                | 24                | 450               | 556             | 81                  |               |                                 |                                    |                        |
| Patient1 | F      | 1931       | 70           | 81                 | 11               |      | 3                    |                   |                   |                   |                 |                     |               |                                 |                                    |                        |
| Patient1 | F      | 1931       | 70           | 83                 | 13               | 675  | 3                    | 63                |                   |                   |                 |                     |               |                                 |                                    |                        |
| Patient1 | F      | 1931       | 70           | 83                 | 13               |      | 3                    |                   | 12                |                   |                 |                     |               |                                 |                                    |                        |
| Patient2 | F      | 1958       | 40           | 50                 | 10               | 940  | 2                    | 13                |                   | 1003              | 144             | 31                  |               |                                 |                                    |                        |
| Patient2 | F      | 1958       | 40           | 52                 | 12               | 1148 |                      | 25                | 28                | 819               | 148             | 26                  |               |                                 |                                    |                        |
| Patient2 | F      | 1958       | 40           | 53                 | 13               | 1148 | 2                    | 21                | 27                | 923               | 237             | 35                  | 794           | 444.25                          | 3                                  | positive               |
| Patient2 | F      | 1958       | 40           | 54                 | 14               | 894  | 2                    | 24                | 26                | 794               | 200             | 32                  | 830           | 267.15                          | 4                                  | positive               |
| Patient2 | F      | 1958       | 40           | 54                 | 14               |      | 2                    |                   | 26                |                   |                 |                     |               |                                 |                                    |                        |
| Patient2 | F      | 1958       | 40           | 55                 | 15               | 1290 | 2                    | 11                | 26                |                   |                 |                     |               |                                 |                                    |                        |
| Patient2 | F      | 1958       | 40           | 64                 | 24               | 1237 | 2                    | 11                | 28                |                   |                 |                     |               |                                 |                                    |                        |

**Table S3: Demographic, clinical, and CSF biomarker information of the two LRRK2 G2019S-PD patient donors.**  
 Characteristics of the two LRRK2 G2019S-PD patients for demographic, clinical, and CSF data. LEDD = Levodopa Equivalent Dose, UPDRS = Unified Parkinson's Disease Rating Scale, MoCA = Montreal Cognitive Assessment, NfL = neurofilament, RT-QulC = real-time quaking-induced conversion.
